# Supplementary material for: Low Serum Branched-chain Amino Acid and Insulin-Like Growth Factor-1 Levels Are Associated with Sarcopenia and Slow Gait Speed in Patients with Liver Cirrhosis
Source: MDPI journal article supplement (doi:10.3390/jcm9103239), 2020-10-10
Supplement: s1 [file s1]

# **Low Serum Branched-chain Amino Acid and Insulin-Like Growth Factor-1 Levels Are Associated with Sarcopenia and Slow Gait Speed in Patients with Liver Cirrhosis**

Chisato Saeki <sup>1,2,\*</sup>, Tomoya Kanai, MD <sup>1,2</sup>, Masanori Nakano <sup>1,2</sup>, Tsunekazu Oikawa <sup>1</sup>, Yuichi Torisu <sup>1,2</sup>, Masayuki Saruta <sup>1</sup>, and Akihito Tsubota <sup>3,\*</sup>

## **Supplementary Materials:**

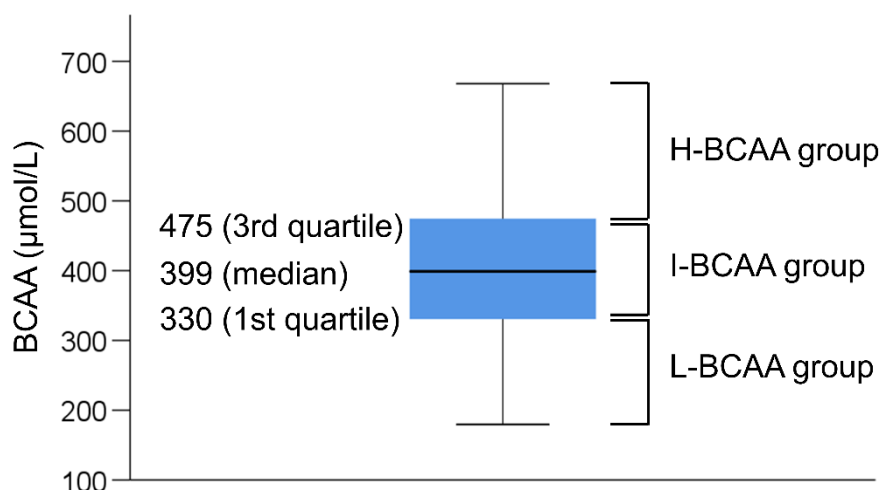

**Figure S1.** Classification based on baseline serum branched-chain amino acid (BCAA) levels. The median (interquartile range) of the BCAA levels was 399 (330–475)  $\mu\text{mol/L}$ . The 192 patients were classified into three groups: (1) low (L)-BCAA group with BCAA levels  $\leq 330$   $\mu\text{mol/L}$  (first quartile); (2) intermediate (I)-BCAA group with BCAA levels between 330 and 475  $\mu\text{mol/L}$  (third quartile); and (3) high (H)-BCAA group with BCAA levels  $\geq 475$   $\mu\text{mol/L}$ .

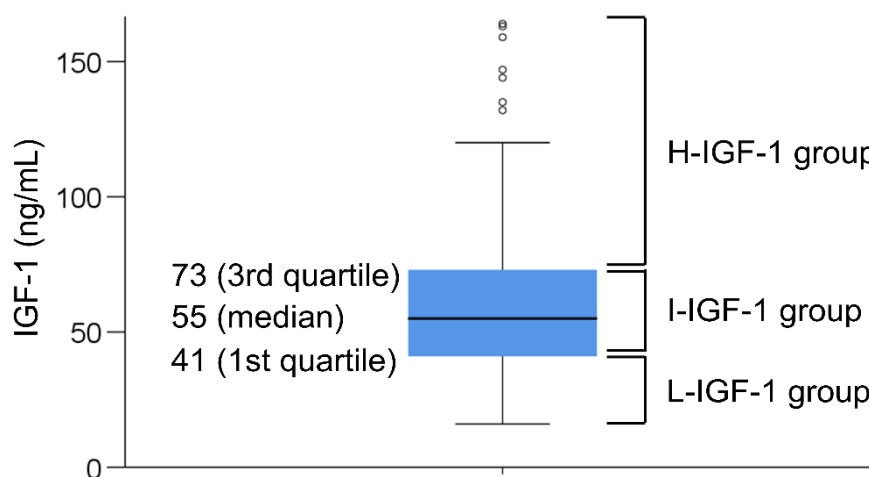

**Figure S2.** Classification based on baseline serum insulin-like growth factor 1 (IGF-1) levels. The median (interquartile range) of the IGF-1 levels was 55 (41–73)  $\text{ng/mL}$ . The 192 patients were classified into three groups: (1) low (L)-IGF-1 group with IGF-1 levels  $\leq 41$   $\text{ng/mL}$  (first quartile); (2) intermediate (I)-BCAA group with IGF-1 levels between 41 and 73  $\text{ng/mL}$  (third quartile); and (3) high (H)-IGF-1 group with IGF-1 levels  $\geq 73$   $\text{ng/mL}$ .

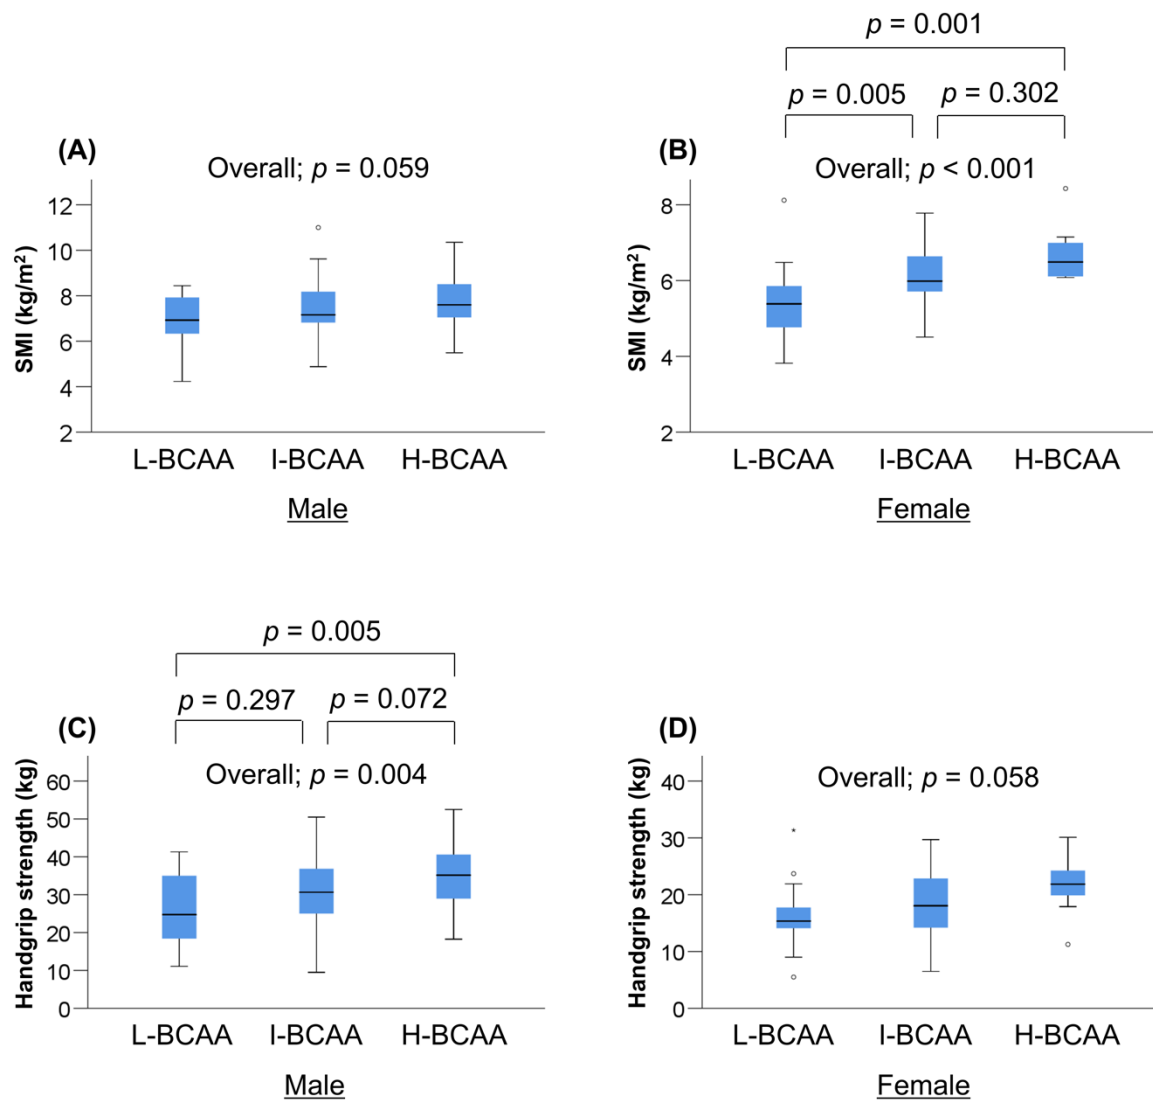

**Figure S3.** Comparison of clinical characteristics among the low (L)-branched-chain amino acid (BCAA), intermediate (I)-BCAA, and H-BCAA groups according to gender. **(A)** Skeletal muscle mass index (SMI) decreased stepwise with a reduction in the BCAA level in male patients, although the difference was not statistically significant. **(B)** SMI values were significantly lower in the L-BCAA group than in the I-BCAA and H-BCAA groups in female patients. **(C)** Handgrip strength values were significantly lower in the L-BCAA group than in the H-BCAA group in male patients. **(D)** Handgrip strength decreased stepwise with a reduction in the BCAA level in female patients, although the difference was not statistically significant.

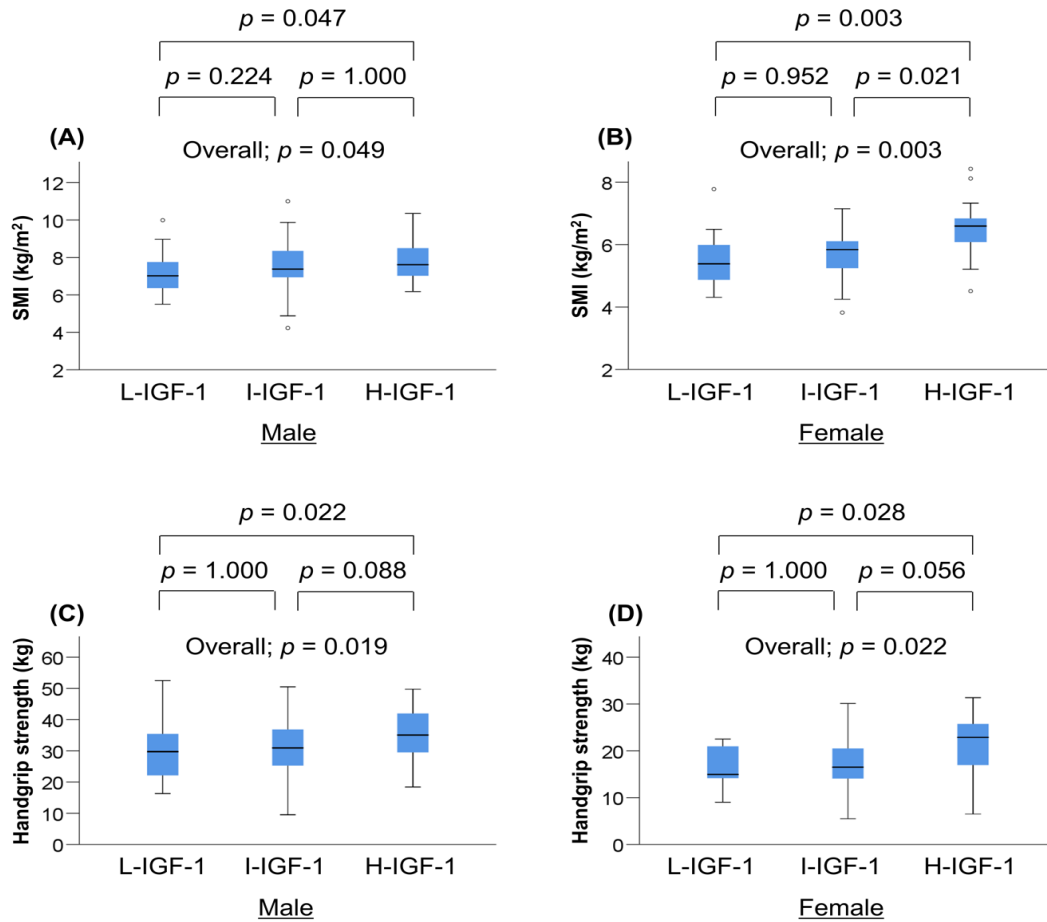

**Figure S4.** Comparison of clinical characteristics among the low (L)-insulin-like growth factor 1 (IGF-1), I-IGF-1, and H-IGF-1 groups according to gender. (A), (C) Skeletal muscle mass index (SMI) and handgrip strength values were significantly lower in the L-IGF-1 group than in the H-IGF-1 group in male patients. (B) SMI values were significantly lower in the L-IGF-1 and I-IGF-1 groups than in the H-IGF-1 group in female patients. (D) Handgrip strength values were significantly lower in the L-IGF-1 group than in the H-IGF-1 group in female patients.

**Table S1.** Univariate analysis for factors associated with sarcopenia.

| Variable                 | OR (95% CI)         | <i>p</i> Value |
|--------------------------|---------------------|----------------|
| Age (years)              | 1.079 (1.041–1.117) | <0.001         |
| Male                     | 0.574 (0.299–1.099) | 0.094          |
| BMI (kg/m <sup>2</sup> ) | 0.707 (0.622–0.803) | <0.001         |
| Etiology                 | 0.750 (0.534–1.055) | 0.099          |
| Child–Pugh B + C         | 1.249 (0.647–2.410) | 0.507          |
| Total bilirubin (mg/dL)  | 1.219 (0.813–1.828) | 0.337          |
| Albumin (g/dL)           | 0.470 (0.267–0.826) | 0.009          |
| Prothrombin time (%)     | 1.005 (0.985–1.025) | 0.625          |
| IGF-1 (ng/mL)            | 0.960 (0.942–0.978) | <0.001         |
| BCAA (μmol/L)            | 0.989 (0.985–0.993) | <0.001         |
| Zinc (μg/dL)             | 0.984 (0.964–1.005) | 0.132          |
| SMI (kg/m <sup>2</sup> ) | 0.172 (0.101–0.292) | <0.001         |
| Handgrip strength (kg)   | 0.829 (0.782–0.878) | <0.001         |

BCAA, branched-chain amino acid; BMI, body mass index; CI, confidence interval; IGF-1, insulin-like growth factor 1; OR, odds ratio; SMI, skeletal muscle mass index.

**Table S2.** Correlation between serum BCAA concentrations and baseline characteristics.

| Variable                 | Correlation Coefficient | <i>p</i> Value |
|--------------------------|-------------------------|----------------|
| Age (years)              | 0.075                   | 0.303          |
| BMI (kg/m <sup>2</sup> ) | 0.305                   | <0.001         |
| Child–Pugh score         | –0.341                  | <0.001         |
| Total bilirubin (mg/dL)  | 0.013                   | 0.862          |
| Albumin (g/dL)           | 0.317                   | <0.001         |
| Prothrombin time (%)     | 0.238                   | 0.001          |
| IGF-1 (ng/mL)            | 0.293                   | <0.001         |
| Zinc (μg/dL)             | 0.307                   | <0.001         |
| SMI (kg/m <sup>2</sup> ) | 0.409                   | <0.001         |
| Handgrip strength (kg)   | 0.419                   | <0.001         |
| Gait speed (m/s)         | 0.245                   | 0.001          |

BCAA, branched-chain amino acid; BMI, body mass index; IGF-1, insulin-like growth factor 1; SMI, skeletal muscle mass index.

**Table S3.** Correlation between serum IGF-1 concentrations and baseline characteristics.

| Variable                 | Correlation Coefficient | <i>p</i> Value |
|--------------------------|-------------------------|----------------|
| Age (years)              | –0.129                  | 0.075          |
| BMI (kg/m <sup>2</sup> ) | 0.192                   | 0.008          |
| Child–Pugh score         | –0.253                  | <0.001         |
| Total bilirubin (mg/dL)  | 0.174                   | 0.016          |
| Albumin (g/dL)           | 0.270                   | <0.001         |
| Prothrombin time (%)     | 0.305                   | <0.001         |
| BCAA (μmol/L)            | 0.293                   | <0.001         |
| Zinc (μg/dL)             | 0.176                   | 0.016          |
| SMI (kg/m <sup>2</sup> ) | 0.261                   | <0.001         |
| Handgrip strength (kg)   | 0.256                   | <0.001         |
| Gait speed (m/s)         | 0.355                   | <0.001         |

BCAA, branched-chain amino acid; BMI, body mass index; IGF-1, insulin-like growth factor 1; SMI, skeletal muscle mass index.
